# Supplementary material for: Coupling hydrophilic interaction chromatography materials with immobilized Fe3+ for phosphopeptide and glycopeptide enrichment and separation
Source: Royal Society of Chemistry journal article supplement (doi:10.1039/d0ra01048k), 2020-01-01
Supplement: d0ra01048k3.xlsx [file d0ra01048k3.xlsx]

## Sheet: Sheet1
No.	Peptide sequence [a]		[M+H]+	Found	Assignment
	Peptide mol. weight (calcd)		(calcd)	mass [b]
p1	EQLpSTpSEENSK (1250.56)	2	1411.53	706.24 (z = 2)	S2[141-151]
p2	TVDMEpSTEVFTK (1385.64)	1	1466.63	733.78 (z = 2)	S2[153-164]
p3	TVDMEpSTEVFTK (1401.64)	1	1482.63	741.78 (z = 2)	S2[153-164]
p4	EQLpSTpSEENSKK (1378.66)	2	1539.63	770.27 (z = 2)	S2[141-152]
p5	TVDMEpSTEVFTKK (1513.73)	1	1594.72	797.84 (z = 2)	S2[153-165]
p6	VPQLEIVPNpSAEER (1579.82)	1	1660.81	830.87 (z = 2)	S1[121-134]
p7	YLGEYLIVPNpSAEER (1751.87)	1	1832.86	916.90 (z = 2)	S2[17-37]
p8	DIGSEpSTEDQAMEDIK (1766.75)	1	1847.74	924.33 (z = 2)	S1[58-73]
p9	DIGpSEpSTEDQAMEDIK (1766.75)	2	1927.72	964.31 (z = 2)	S1[58-73
p10	DIGpSEpSTEDQAMEDIK (1782.75)	2	1943.72	972.32 (z = 2)	S1[58-73
p11	YKVPQLEIVPNpSAEER (1870.98)	1	1951.97	976.45 (z = 2)， 651.29（z =3）	S1[119-134
p12	QMEAEpSIpSpSpSEEIVPNpSVEQ (2192.99)	5	2593.9	1296.91 (z = 2)，864.91 (z = 3)	S1[74-93]
13	NTMEHVpSpSpSEESIIpSQETYK (2298.03)	4	2618.96	1309.93 (z = 2)，873.61 (z = 3)	S2[17-36]
p14	pyroQMEAEpSIpSpSpSEEIVPNSVEQK [c] (2321.08)	4	2624	1312.45 (z = 2)，874.95 (z = 3)	S1[74-94]
p16	NTMEHVSpSpSpEESIISQETYKQ	3	2666.99	1333.99 (z = 2)，889.67 (z = 3)	-S2[17-36
p17	VNELpSKDIGpSEpSTEDQAMEDIK (2437.12)	3	2678.07	1339.48 (z = 2)，893.30 (z = 3)	S1[52-73]
p18	pyroQMEAEpSIpSpSpSEEIVPNpSVEQK [c] (2321.08)	5	2704.98	1352.40 (z = 2)，901.93 (z = 3)	S1[114-135]
p19	QMEAEpSIpSpSpSEEIVPNpSVEQK (2320.07)	5	2720.98	1360.92 (z = 2)，907.62 (z = 3)	S1[74-94]
p20	QMEAEpSIpSpSpSEEIVPNpSVEQK (2321.08)	5	2737.99	1368.91 (z = 2)，912.94 (z = 3)	S1[74-94]
p21	NTMEHVpSpSpSEEpSIISQETYKQ (2426.09)	4	2747.02	1373.95 (z = 2)，916.32 (z = 3)	S2[17-37]
p22	EKVNELpSKDIGpSEpSTEDQAMEDIK (2694.25)	3	2935.18	1468.08 (z = 2)， 979.02 (z = 3)	S1[50-73]
p23	NANEEEYSIGpSpSpSEEpSAEVATEEVK (2687.16)	4	3008.09	1504.49 (z = 2)，1003.32 (z = 3)	S2[61-85]
p24	NANEEEYpSIGpSpSpSEEpSAEVATEEVK (2687.16)	5	3088.07	1544.46 (z = 2)，1029. 97 (z = 3)	S2[61-85]
p25	NTMEHVSpSpSpEESIISQETYKQ	3	2666.99	1333.99 (z = 2)，889.67 (z = 3)	-S2[17-36

## Sheet: Sheet2
Table S1 The detailed information of identified phosphopeptides
No.	Peptide sequence and its mol. weight (calcd)	Number of P-sites	Found mass (charge states)	Assignment
p1	TVDMEpSTEVFTK (1385.64)	1	733.78 (z = 2)	S2[153-164]
p2	TVDMEpSTEVFTKK (1513.73)	1	797.84 (z = 2)	S2[153-165]
p3	VPQLEIVPNpSAEER (1579.82)	1	830.87 (z = 2)	S1[121-134]
p4	YLGEYLIVPNpSAEER (1751.87)	1	916.90 (z = 2)	S2[17-37]
p5	DIGSEpSTEDQAMEDIK (1766.75)	1	924.33 (z = 2)	S1[58-73]
p6	YKVPQLEIVPNpSAEER (1870.98)	1	976.45 (z = 2)	S1[119-134]
p7	DIGpSEpSTEDQAMEDIK (1766.75)	2	964.31 (z = 2)	S1[58-73]
p8	VNELpSKDIGpSEpSTEDQAMEDIK (2437.12)	3	1339.48 (z = 2)	S1[52-73]
