# Supplementary material for: Coupling hydrophilic interaction chromatography materials with immobilized Fe3+ for phosphopeptide and glycopeptide enrichment and separation
Source: Royal Society of Chemistry journal article supplement (doi:10.1039/d0ra01048k), 2020-01-01
Supplement: d0ra01048k4.xlsx [file d0ra01048k4.xlsx]

## Sheet: Sheet1
Table S2The detailed information of identified glycopeptides
No.	Position	Peptide sequence	Glycan	m/z of observed glycopeptide(charges)
P1	1-28	VVHAVEVALATFNAESNGSYLQLVEISR	Hex4HexNAc4SA4	1728.9402(5+)
P2	1-28	VVHAVEVALATFNAESNGSYLQLVEISR	Hex4HexNAc4SA5	1786.9829 (5+)
P3	72-103	RPTGEVYDIEIDTLETTCHVLDPTPLANCSVR(Cys_CAM: 89, 100)	[Hex]6[HexNAc]5[NueAC]4	1366.1531(5+)
P4	72-103	RPTGEVYDIEIDTLETTCHVLDPTPLANCSVR(Cys_CAM: 89, 100)	[Hex]7[HexNAc]6[Fucose]2	1373.5876(5+)
P5	72-103	RPTGEVYDIEIDTLETTCHVLDPTPLANCSVR(Cys_CAM: 89, 100)	[Hex]5[HexNAc]4[NueAC]1	1397.3334(4+)
P6	72-103	RPTGEVYDIEIDTLETTCHVLDPTPLANCSVR(Cys_CAM: 89, 100)	[Hex]5[HexNAc]4[NueAC]2	1470.3579(4+)
P7	72-103	RPTGEVYDIEIDTLETTCHVLDPTPLANCSVR(Cys_CAM: 89, 100)	[Hex]3[HexNAc]3	1589.9593(3+)/1193.0195(4+)
P8	72-103	RPTGEVYDIEIDTLETTCHVLDPTPLANCSVR(Cys_CAM: 89, 100)	[Hex]6[HexNAc]5[NueAC]3	1634.4000(4+)/1307.7515 (5+)
P9	72-103	RPTGEVYDIEIDTLETTCHVLDPTPLANCSVR(Cys_CAM: 89, 100)	[Hex]6[HexNAc]5[NueAC]4	1707.4224(4+)
P10	72-120	RPTGEVYDIEIDTLETTCHVLDPTPLAN(99)CSVRQQTQHAVE GDCDIHVLK(Cys_CAM: 89, 100)	[Hex]6[HexNAc]5	1524.9136(5+)
P11	144-159	KLCPDCPLLAPLNDSR(Cys_CAM: 146, 149)	[Hex]6[HexNAc]5[NueAC]4	1632.2795(3+)
P13	144-159	KLCPDCPLLAPLNDSR(Cys_CAM: 146, 149)	[Hex]6[HexNAc]5[NueAC]2	1437.9047(4+)
P14	144-159	KLCPDCPLLAPLNDSR(Cys_CAM: 146, 149)	[Hex]5[HexNAc]4[NueAC]2	1359.2320(3+)
P15	144-159	KLCPDCPLLAPLNDSR(Cys_CAM: 146, 149)	[Hex]6[HexNAc]5[NueAC]2	1480.6014(3+)
P16	144-159	KLCPDCPLLAPLNDSR(Cys_CAM: 146, 149)	[Hex]6[HexNAc]5[NueAC]3	1577.9650(3+)/ 1183. 5413 (4+)
P17	145-159	LCPDCPLLAPLNDSR	[Hex]6[HexNAc]5[NueAC]2	1480.9337(3+)
P18	145-159	LCPDCPLLAPLNDSR(Cys_CAM: 146, 149)	[Hex]5[HexNAc]4[NueAC]2	1316.2095(3+)
P19	145-159	LCPDCPLLAPLNDSR(Cys_CAM: 146, 149)	[Hex]6[HexNAc]5[NueAC]3	1534.9304(3+)
P20	145-159	LCPDCPLLAPLNDSR(Cys_CAM: 146, 149)	[Hex]6[HexNAc]5[NueAC]4	1675.3292(3+)
P21	246-306	VTCTLFQTQPVIPQPQPDGAEAEAPSAVPDAAGPTPSAAG PPVASVVVGPSVVAVPLPLHR	Hex2HexNAc2[NueAC]2	1466.1666(5+)
P22	246-306	VTCTLFQTQPVIPQPQPDGAEAEAPSAVPDAAGPTPSAAG PPVASVVVGPSVVAVPLPLHR	Hex2HexNAc2[NueAC]3	1524.9136(5+)
P23	246-306	VTCTLFQTQPVIPQPQPDGAEAEAPSAVPDAAGPTPSAAG PPVASVVVGPSVVAVPLPLHR	Hex3HexNAc3[NueAC]3	1597.9320(5+)
P24	246-306	VTCTLFQTQPVIPQPQPDGAEAEAPSAVPDAAGPTPSAAG PPVASVVVGPSVVAVPLPLHR	[Hex]5[HexNAc]4[NueAC]1	1644.7698(4+)
P25	246-306	VTCTLFQTQPVIPQPQPDGAEAEAPSAVPDAAGPTPSAAG PPVASVVVGPSVVAVPLPLHR	Hex3HexNAc3[NueAC]4	1655.7263 (5+)
P26	246-306	VTCTLFQTQPVIPQPQPDGAEAEAPSAVPDAAGPTPSAAG PPVASVVVGPSVVAVPLPLHR	[Hex]5[HexNAc]4[NueAC]1	1664.3883(4+)/1331. 0991(5+)
P27	246-306	VTCTLFQTQPVIPQPQPDGAEAEAPSAVPDAAGPTPSAAG PPVASVVVGPSVVAVPLPLHR	[Hex]1[HexNAc]1[NueAC]2	1741.0674(3+)/1306.3125 (4+)
